# Supplementary material for: Learning Unicycling Evokes Manifold Changes in Gray and White Matter Networks Related to Motor and Cognitive Functions
Source: PubMed Central journal article supplement (PMC6416294; doi:10.1038/s41598-019-40533-6), 2019-03-13
Supplement: 41598_2019_40533_MOESM1_ESM.pdf [file 41598_2019_40533_MOESM1_ESM.pdf]

## Supplementary Information

# Learning Unicycling Evokes Manifold Changes in Gray and White Matter Networks Related to Motor- and Cognitive Functions

Weber, B., Koschutnig, K., Schwerdtfeger, A., Rominger, C., Papousek, I., Weiss, E. M., Tilp, M., & Fink, A.

Supplementary Table S1. Classification accuracy for changes in GM and FA

|                              | GM            | FA            | GM & FA       |
|------------------------------|---------------|---------------|---------------|
| Total accuracy (%)           | 80.43         | 50.00         | 78.26         |
| p-value of balanced accuracy | 0.002         | 0.462         | 0.001         |
| Class accuracy (%) / p-value |               |               |               |
| learning period              | 82.61 / 0.005 | 56.52 / 0.390 | 82.61 / 0.001 |
| post-learning period         | 78.26 / 0.004 | 43.48 / 0.750 | 73.91 / 0.031 |

**Table S1.** The total classification accuracy to distinguish between learning period (post-test – pre-test) and post-learning period (follow-up – post-test) shows highest scores for GM. The balanced accuracy of the support vector machine analysis revealed a significant separation for the learning period using GM and a combination of GM and FA. Same is true for the post-learning period with higher p-values for GM. All results are based non-parametric permutation test ( $N_{\text{permutations}} = 10.000$ ).

Supplementary Figure S1. Multivariate pattern recognition analysis

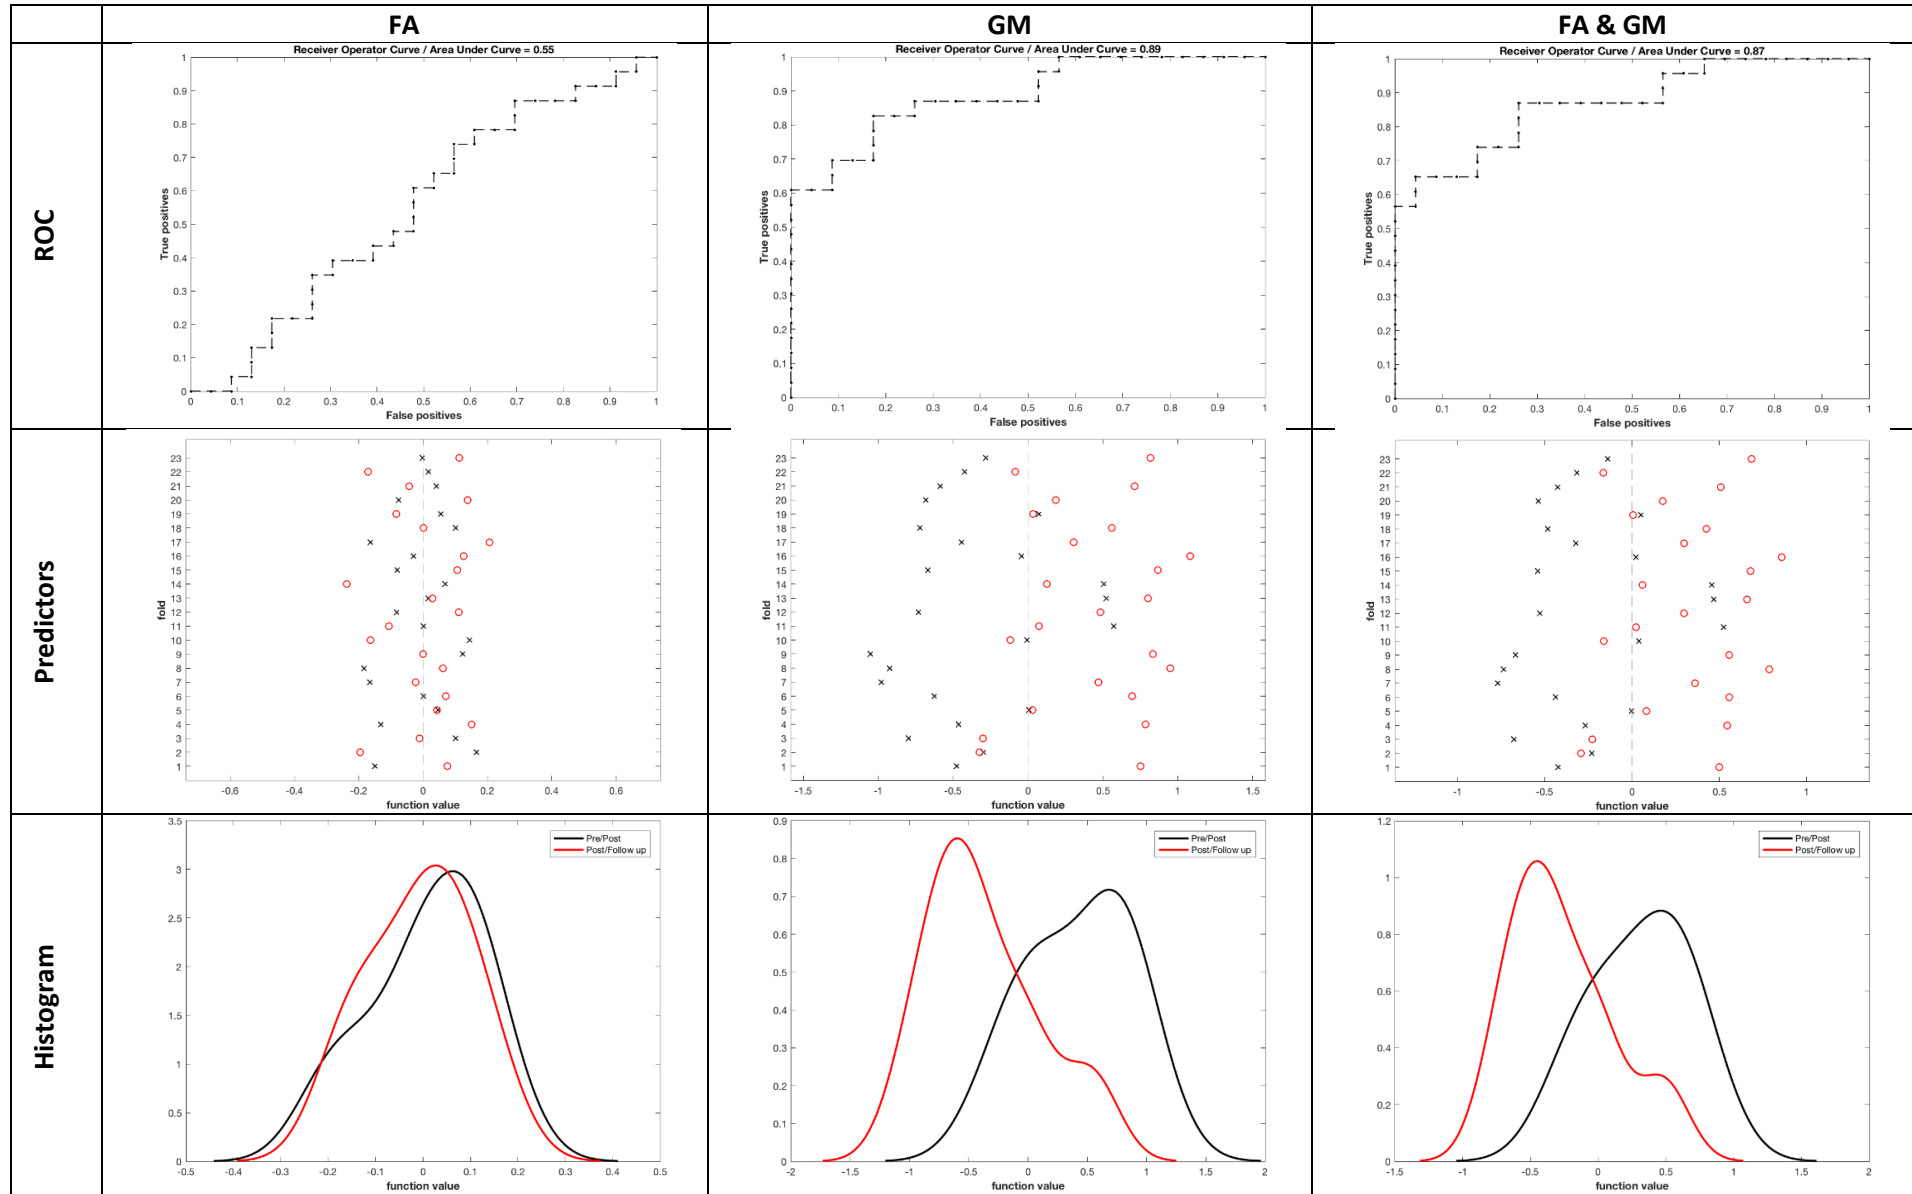

**Figure S1** Support vector machine classification of the learning period and the post-learning period based on white-matter derived fractional anisotropy and GM volume. We performed a pattern recognition analysis for each modality separately and for both modalities together. As depicted in Supplementary Table S1 the highest classification accuracy has been found for GM volume changes. The receiver operating characteristics (ROC) showing the tradeoff between specificity and sensitivity, including the area under the curve (0.55 for FA, 0.89 for GM and 0.87 for FA and GM). The highest classification accuracy for GM is supported by the plot of functional values, showing that for FA almost the half of the post-training values (red circles) are negative. For GM and for both modalities the majority of the post-training values have positive values. However, the difference between GM volume and both modalities is very small. This is supported by the corresponding histogram

Supplementary Figure S2. Changes in Axial and Mean Diffusivity

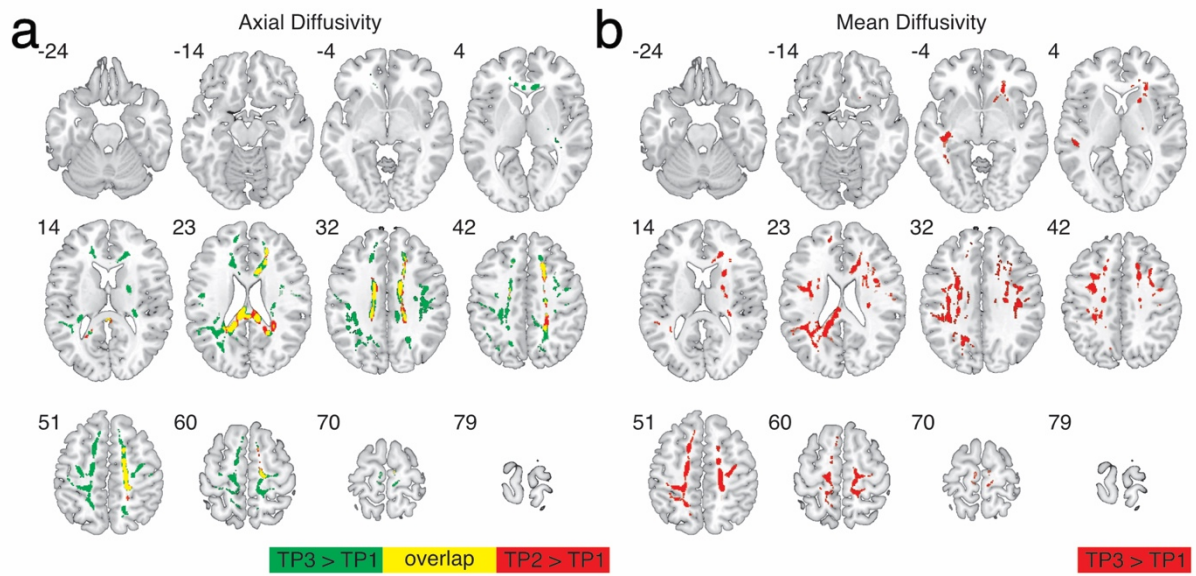

**Figure S2.** Axial (a) and mean diffusivity (b). Increases of axial diffusivity from TP1 to TP2 to TP3 and increases of mean diffusivity from TP1 to TP3. Results are FWE ( $p=0.05$ ) corrected at voxel-level.

Supplementary Table S2. Changes in Axial and Mean Diffusivity

| Contrast            | Region                           | H | Cluster | 1-p<br>FWE | MNI-coordinates |     |     |
|---------------------|----------------------------------|---|---------|------------|-----------------|-----|-----|
|                     |                                  |   |         |            | X               | Y   | Z   |
| AD: post > pre      |                                  |   |         |            |                 |     |     |
|                     | Corticospinal tract              | R | 9810    | 0.978      | 90              | 92  | 92  |
|                     | Anterior thalamic radiation      | L | 52      | 0.954      | 106             | 139 | 119 |
| AD: follow-up > pre |                                  |   |         |            |                 |     |     |
|                     | Forceps minor                    |   | 2769    | 0.982      | 90              | 91  | 91  |
|                     | Cingulum (cingulate gyrus)       | L | 1710    | 0.983      | 71              | 79  | 116 |
|                     | Forceps major                    | R | 182     | 0.959      | 67              | 75  | 95  |
|                     | Superior longitudinal fasciculus | L | 159     | 0.956      | 133             | 81  | 106 |
|                     | Corticospinal tract              | L | 78      | 0.956      | 109             | 111 | 112 |
|                     | Superior longitudinal fasciculus | L | 33      | 0.953      | 130             | 71  | 112 |

---

MD: follow-up > pre

|                                      |   |      |       |     |     |     |
|--------------------------------------|---|------|-------|-----|-----|-----|
| Superior longitudinal fasciculus     | L | 4880 | 0.973 | 114 | 92  | 125 |
| Superior longitudinal fasciculus     | R | 2403 | 0.972 | 70  | 106 | 121 |
| Anterior thalamic radiation          | R | 1242 | 0.962 | 67  | 140 | 87  |
| Forceps minor                        |   | 413  | 0.958 | 73  | 155 | 90  |
| Inferior fronto-occipital fasciculus | L | 255  | 0.957 | 128 | 98  | 70  |
| Superior longitudinal fasciculus     | R | 215  | 0.961 | 71  | 137 | 110 |
| Superior longitudinal fasciculus     | L | 154  | 0.954 | 150 | 98  | 76  |
| Inferior fronto-occipital fasciculus | L | 104  | 0.953 | 103 | 163 | 108 |
| Superior longitudinal fasciculus     | L | 97   | 0.954 | 100 | 143 | 128 |
| Forceps minor                        |   | 59   | 0.952 | 104 | 176 | 93  |

---

**Table S2.** Significant changes in DTI for AD and MD. (1-p)-values corrected for multiple comparison (FWE) are reported. AD, axial diffusivity; MD, mean diffusivity; H, hemisphere; L, left; R, right; FWE, family-wise-error; pre, pre - test; post, post - test; follow-up, follow-up - test.
